# Supplementary material for: Nearctic Species in the Palearctic: Trans-Beringian Range, Phylogeny and Phylogeography of Pterostichus (Cryobius) mandibularoides (Coleoptera, Carabidae)
Source: MDPI journal article supplement (doi:10.3390/d14060415), 2022-05-24
Supplement: s1 [file s1]

# Supplementary Materials:

**Table S1.** List of sequenced specimens of *Pterostichus mandibularoides*, *Pterostichus brevicornis* and *Pterostichus nivalis*, including the location with BOLD and NCBI's GenBank accession numbers

| Species                                                          | GenBank /<br>BOLD IDS acc.<br>no. (COI) | GenBank /<br>BOLD IDS acc.<br>no. (28S rRNA) | Locality                                           | Data source*        |
|------------------------------------------------------------------|-----------------------------------------|----------------------------------------------|----------------------------------------------------|---------------------|
| <i>Pterostichus mandibularoides</i><br>Ball, 1966                | MZ351271                                | MZ366469                                     | Russia, Wrangel<br>Island, Somnitelnaya<br>Bay     | Present study       |
| <i>P. mandibularoides</i>                                        | MZ351283                                | n/a                                          | Russia, Wrangel<br>Island, Somnitelnaya<br>Bay     | Present study       |
| <i>P. mandibularoides</i>                                        | MZ351286                                | n/a                                          | Russia, Wrangel<br>Island, Somnitelnaya<br>Bay     | Present study       |
| <i>P. mandibularoides</i>                                        | MZ351272                                | MZ366470                                     | Russia, Wrangel<br>Island, Somnitelnye<br>Mountain | Present study       |
| <i>P. mandibularoides</i>                                        | MZ351273                                | MZ366471                                     | Russia, Wrangel<br>Island, Somnitelnye<br>Mountain | Present study       |
| <i>P. mandibularoides</i>                                        | MZ351274                                | MZ366472                                     | Russia, Wrangel<br>Island, Somnitelnye<br>Mountain | Present study       |
| <i>P. mandibularoides</i>                                        | MZ351284                                | n/a                                          | Russia, Wrangel<br>Island, Somnitelnye<br>Mountain | Present study       |
| <i>P. mandibularoides</i>                                        | MZ351275                                | MZ366475                                     | Russia, Chukotka,<br>Alkatvaam                     | Present study       |
| <i>P. mandibularoides</i>                                        | MZ351276                                | MZ366476                                     | Russia, Chukotka,<br>Alkatvaam                     | Present study       |
| <i>P. mandibularoides</i>                                        | MZ351279                                | MZ366477                                     | Russia, Chukotka,<br>Meynipilgino                  | Present study       |
| <i>P. mandibularoides</i>                                        | MZ351280                                | MZ366478                                     | Russia, Chukotka,<br>Meynipilgino                  | Present study       |
| <i>P. mandibularoides</i>                                        | FCHAR1286-3                             | n/a                                          | Canada, Nunavut                                    | BOLD IDS            |
| <i>P. mandibularoides</i>                                        | FCHAR1288-3                             | n/a                                          | Canada, Nunavut                                    | BOLD IDS            |
| <i>P. mandibularoides</i>                                        | FCHAR1296-3                             | n/a                                          | Canada, Nunavut                                    | BOLD IDS            |
| <i>P. mandibularoides</i>                                        | FCHAR1299-3                             | n/a                                          | Canada, Nunavut                                    | BOLD IDS            |
| <i>P. mandibularoides</i>                                        | BETN7527-3                              | n/a                                          | USA, Alaska, Toolik                                | BOLD IDS            |
| <i>P. mandibularoides</i>                                        | BETN4268-3                              | n/a                                          | USA, Alaska, Toolik                                | BOLD IDS            |
| <i>P. mandibularoides</i>                                        | BETN7561-3                              | n/a                                          | USA, Alaska, Toolik                                | BOLD IDS            |
| <i>P. mandibularoides</i>                                        | BETN7532-3                              | n/a                                          | USA, Alaska, Toolik                                | BOLD IDS            |
| <i>P. mandibularoides</i>                                        | BETN7526-3                              | n/a                                          | USA, Alaska, Toolik                                | BOLD IDS            |
| <i>P. mandibularoides</i>                                        | BETN4236-3                              | n/a                                          | USA, Alaska, Toolik                                | BOLD IDS            |
| <i>P. mandibularoides</i>                                        | BETN4229-3                              | n/a                                          | USA, Alaska, Toolik                                | BOLD IDS            |
| <i>Pterostichus bevicornis</i><br><i>brevicornis</i> Kirby, 1837 | MN673460.1<br>ACHAR803-18               | n/a                                          | Canada, Nunavut                                    | Pentinsaari, 2020   |
| <i>P. b. brevicornis</i>                                         | MN670020.1<br>ACHAR781-18               | n/a                                          | Canada, Nunavut                                    | Pentinsaari, 2020   |
| <i>P. b. brevicornis</i>                                         | MN679965.1<br>ACHAR828-18               | n/a                                          | Canada, Nunavut                                    | Pentinsaari, 2020   |
| <i>P. b. brevicornis</i>                                         | HQ961899.1<br>JSYKA240-10               | n/a                                          | Canada, Yukon, Firth<br>River                      | GenBank<br>BOLD IDS |
| <i>P. b. brevicornis</i>                                         | HQ961900.1<br>JSYKA241-10               | n/a                                          | Canada, Yukon, Firth<br>River                      | GenBank<br>BOLD IDS |
| <i>P. b. brevicornis</i>                                         | MN672408.1<br>ACHAR877-18               | n/a                                          | Canada, Nunavut                                    | Pentinsaari, 2020   |
| <i>P. b. brevicornis</i>                                         | ACHAR876-18                             | n/a                                          | Canada, Nunavut                                    | BOLD IDS            |
| <i>P. b. brevicornis</i>                                         | MN670684.1                              | n/a                                          | Canada, Nunavut                                    | Pentinsaari, 2020   |

|                          |                           |     |                                |                     |
|--------------------------|---------------------------|-----|--------------------------------|---------------------|
|                          | ACHAR868-18               |     |                                |                     |
| <i>P. b. brevicornis</i> | FCHAR1280                 | n/a | Canada, Nunavut                | GenBank             |
| <i>P. b. brevicornis</i> | FCHAR2131                 | n/a | Canada, Nunavut                | BOLD IDS            |
| <i>P. b. brevicornis</i> | FCHAR6620                 | n/a | Canada, Nunavut                | GenBank             |
| <i>P. b. brevicornis</i> | FCHAR7057                 | n/a | Canada, Nunavut                | BOLD IDS            |
| <i>P. b. brevicornis</i> | FCHAR7369                 | n/a | Canada, Nunavut                | GenBank             |
| <i>P. b. brevicornis</i> | FCHAR7721                 | n/a | Canada, Nunavut                | BOLD IDS            |
| <i>P. b. brevicornis</i> | FCHAR1303                 | n/a | Canada, Nunavut                | GenBank             |
| <i>P. b. brevicornis</i> | FCHAR1618                 | n/a | Canada, Nunavut                | BOLD IDS            |
| <i>P. b. brevicornis</i> | FCHAR2132                 | n/a | Canada, Nunavut                | GenBank             |
| <i>P. b. brevicornis</i> | FCHAR5467                 | n/a | Canada, Nunavut                | BOLD IDS            |
| <i>P. b. brevicornis</i> | JSYKA235-10               | n/a | Canada, Yukon, Firth River     | GenBank<br>BOLD IDS |
| <i>P. b. brevicornis</i> | HQ961895.1<br>JSYKA236-10 | n/a | Canada, Yukon, Firth River     | GenBank<br>BOLD IDS |
| <i>P. b. brevicornis</i> | HQ961896.1<br>JSYKA237-10 | n/a | Canada, Yukon, Firth River     | GenBank<br>BOLD IDS |
| <i>P. b. brevicornis</i> | HQ961897.1<br>JSYKA238-10 | n/a | Canada, Yukon, Firth River     | GenBank<br>BOLD IDS |
| <i>P. b. brevicornis</i> | HQ961898.1<br>JSYKA239-10 | n/a | Canada, Yukon, Firth River     | GenBank<br>BOLD IDS |
| <i>P. b. brevicornis</i> | KJ204113.1<br>HMCOC006-07 | n/a | Canada, Manitoba, Churchill    | Woodcock, 2013      |
| <i>P. b. brevicornis</i> | KJ203181.1<br>HMCOC510-09 | n/a | Canada, Manitoba, Churchill    | Woodcock, 2013      |
| <i>P. b. brevicornis</i> | KJ203639.1<br>HMCOC627-09 | n/a | Canada, Manitoba, Churchill    | Woodcock, 2013      |
| <i>P. b. brevicornis</i> | KJ203239.1<br>MZCHU103-07 | n/a | Canada, Manitoba, Churchill    | Woodcock, 2013      |
| <i>P. b. brevicornis</i> | KJ203875.1<br>MZCHU107-07 | n/a | Canada, Manitoba, Churchill    | Woodcock, 2013      |
| <i>P. b. brevicornis</i> | KJ204094.1<br>MZCHU111-07 | n/a | Canada, Manitoba, Churchill    | Woodcock, 2013      |
| <i>P. b. brevicornis</i> | JN310764.1<br>TWCOL664-10 | n/a | Canada, Manitoba, Churchill    | GenBank<br>BOLD IDS |
| <i>P. b. brevicornis</i> | KJ203437.1<br>DSCOL501-07 | n/a | Canada, Manitoba, Churchill    | Woodcock, 2013      |
| <i>P. b. brevicornis</i> | KJ203343.1<br>HMCOC242-07 | n/a | Canada, Manitoba, Churchill    | Woodcock, 2013      |
| <i>P. b. brevicornis</i> | KJ204090.1<br>HMCOC259-07 | n/a | Canada, Manitoba, Churchill    | Woodcock, 2013      |
| <i>P. b. brevicornis</i> | KJ203213.1<br>HMCOC631-09 | n/a | Canada, Manitoba, Churchill    | Woodcock, 2013      |
| <i>P. b. brevicornis</i> | KJ203822.1<br>HMCOC632-09 | n/a | Canada, Manitoba, Churchill    | Woodcock, 2013      |
| <i>P. b. brevicornis</i> | KJ204238.1<br>HMCOC629-09 | n/a | Canada, Manitoba, Churchill    | GenBank<br>BOLD IDS |
| <i>P. b. brevicornis</i> | HQ582357.1<br>TWCOL385-10 | n/a | Canada, Manitoba               | GenBank<br>BOLD IDS |
| <i>P. b. brevicornis</i> | KJ203657.1<br>HMCOL237-09 | n/a | Canada, Manitoba, Churchill    | Woodcock, 2013      |
| <i>P. b. brevicornis</i> | KU876036.1<br>UAMIC364-13 | n/a | USA, Alaska, Talkeetna         | Sikes, 2017         |
| <i>P. b. brevicornis</i> | BETN4365-19               | n/a | USA, Alaska, Fairbanks Borough | BOLD IDS            |
| <i>P. b. brevicornis</i> | BETN4479-19               | n/a | USA, Alaska, Fairbanks Borough | BOLD IDS            |
| <i>P. b. brevicornis</i> | BETN4485-19               | n/a | USA, Alaska, Fairbanks Borough | BOLD IDS            |
| <i>P. b. brevicornis</i> | BETN4487-19               | n/a | USA, Alaska, Fairbanks Borough | BOLD IDS            |

|                          |             |     |                                     |          |
|--------------------------|-------------|-----|-------------------------------------|----------|
| <i>P. b. brevicornis</i> | BETN4497-19 | n/a | USA, Alaska,<br>Fairbanks Borough   | BOLD IDS |
| <i>P. b. brevicornis</i> | BETN4506-19 | n/a | USA, Alaska,<br>Fairbanks Borough   | BOLD IDS |
| <i>P. b. brevicornis</i> | BETN647-18  | n/a | USA, Alaska,<br>Fairbanks Borough   | BOLD IDS |
| <i>P. b. brevicornis</i> | BETN4477-19 | n/a | USA, Alaska,<br>Fairbanks Borough   | BOLD IDS |
| <i>P. b. brevicornis</i> | BETN4488-19 | n/a | USA, Alaska,<br>Fairbanks Borough   | BOLD IDS |
| <i>P. b. brevicornis</i> | BETN4361-19 | n/a | USA, Alaska,<br>Fairbanks Borough   | BOLD IDS |
| <i>P. b. brevicornis</i> | BETN4480-19 | n/a | USA, Alaska,<br>Fairbanks Borough   | BOLD IDS |
| <i>P. b. brevicornis</i> | BETN4483-19 | n/a | USA, Alaska,<br>Fairbanks Borough   | BOLD IDS |
| <i>P. b. brevicornis</i> | BETN4484-19 | n/a | USA, Alaska,<br>Fairbanks Borough   | BOLD IDS |
| <i>P. b. brevicornis</i> | BETN4500-19 | n/a | USA, Alaska,<br>Fairbanks Borough   | BOLD IDS |
| <i>P. b. brevicornis</i> | BETN646-18  | n/a | USA, Alaska,<br>Fairbanks Borough   | BOLD IDS |
| <i>P. b. brevicornis</i> | BETN7632-20 | n/a | USA, Alaska,<br>Fairbanks Borough   | BOLD IDS |
| <i>P. b. brevicornis</i> | BETN4478-19 | n/a | USA, Alaska,<br>Fairbanks Borough   | BOLD IDS |
| <i>P. b. brevicornis</i> | BETN4493-19 | n/a | USA, Alaska,<br>Fairbanks Borough   | BOLD IDS |
| <i>P. b. brevicornis</i> | BETN4333-19 | n/a | USA, Alaska,<br>Fairbanks Borough   | BOLD IDS |
| <i>P. b. brevicornis</i> | BETN4372-19 | n/a | USA, Alaska,<br>Fairbanks Borough   | BOLD IDS |
| <i>P. b. brevicornis</i> | BETN4489-19 | n/a | USA, Alaska,<br>Fairbanks Borough   | BOLD IDS |
| <i>P. b. brevicornis</i> | BETN4490-19 | n/a | USA, Alaska,<br>Fairbanks Borough   | BOLD IDS |
| <i>P. b. brevicornis</i> | BETN4319-19 | n/a | USA, Alaska,<br>Fairbanks Borough   | BOLD IDS |
| <i>P. b. brevicornis</i> | BETN4495-19 | n/a | USA, Alaska,<br>Fairbanks Borough   | BOLD IDS |
| <i>P. b. brevicornis</i> | BETN4496-19 | n/a | USA, Alaska,<br>Fairbanks Borough   | BOLD IDS |
| <i>P. b. brevicornis</i> | BETN4318-19 | n/a | USA, Alaska,<br>Fairbanks Borough   | BOLD IDS |
| <i>P. b. brevicornis</i> | BETN4321-19 | n/a | USA, Alaska,<br>Fairbanks Borough   | BOLD IDS |
| <i>P. b. brevicornis</i> | BETN4327-19 | n/a | USA, Alaska,<br>Fairbanks Borough   | BOLD IDS |
| <i>P. b. brevicornis</i> | BETN4481-19 | n/a | USA, Alaska,<br>Fairbanks Borough   | BOLD IDS |
| <i>P. b. brevicornis</i> | BETN7631-20 | n/a | USA, Alaska,<br>Fairbanks Borough   | BOLD IDS |
| <i>P. b. brevicornis</i> | BETN7637-20 | n/a | USA, Alaska,<br>Fairbanks Borough   | BOLD IDS |
| <i>P. b. brevicornis</i> | BETN7640-20 | n/a | USA, Alaska,<br>Fairbanks Borough   | BOLD IDS |
| <i>P. b. brevicornis</i> | BETN7627-20 | n/a | USA, Alaska,<br>Southeast Fairbanks | BOLD IDS |
| <i>P. b. brevicornis</i> | BETN7619-20 | n/a | USA, Alaska,<br>Southeast Fairbanks | BOLD IDS |
| <i>P. b. brevicornis</i> | BETN4409-19 | n/a | USA, Alaska, Denali                 | BOLD IDS |

|                          |             |          |                              |              |
|--------------------------|-------------|----------|------------------------------|--------------|
|                          |             |          | Borough                      |              |
| <i>P. b. brevicornis</i> | BETN4428-19 | n/a      | USA, Alaska, Denali Borough  | BOLD IDS     |
| <i>P. b. brevicornis</i> | BETN4455-19 | n/a      | USA, Alaska, Denali Borough  | BOLD IDS     |
| <i>P. b. brevicornis</i> | BETN4429-19 | n/a      | USA, Alaska, Denali Borough  | BOLD IDS     |
| <i>P. b. brevicornis</i> | BETN4431-19 | n/a      | USA, Alaska, Denali Borough  | BOLD IDS     |
| <i>P. b. brevicornis</i> | BETN4470-19 | n/a      | USA, Alaska, Denali Borough  | BOLD IDS     |
| <i>P. b. brevicornis</i> | BETN609-18  | n/a      | USA, Alaska, Denali Borough  | BOLD IDS     |
| <i>P. b. brevicornis</i> | BETN4458-19 | n/a      | USA, Alaska, Denali Borough  | BOLD IDS     |
| <i>P. b. brevicornis</i> | BETN568-18  | n/a      | USA, Alaska, Denali Borough  | BOLD IDS     |
| <i>P. b. brevicornis</i> | BETN612-18  | n/a      | USA, Alaska, Denali Borough  | BOLD IDS     |
| <i>P. b. brevicornis</i> | BETN4420-19 | n/a      | USA, Alaska, Denali Borough  | BOLD IDS     |
| <i>P. b. brevicornis</i> | BETN579-18  | n/a      | USA, Alaska, Denali Borough  | BOLD IDS     |
| <i>P. b. brevicornis</i> | BETN636-18  | n/a      | USA, Alaska, Denali Borough  | BOLD IDS     |
| <i>P. b. brevicornis</i> | BETN4433-19 | n/a      | USA, Alaska, Denali Borough  | BOLD IDS     |
| <i>P. b. brevicornis</i> | BETN623-18  | n/a      | USA, Alaska, Denali Borough  | BOLD IDS     |
| <i>P. b. brevicornis</i> | BETN633-18  | n/a      | USA, Alaska, Denali Borough  | BOLD IDS     |
| <i>P. b. brevicornis</i> | BETN4423-19 | n/a      | USA, Alaska, Denali Borough  | BOLD IDS     |
| <i>P. b. brevicornis</i> | BETN4254-19 | n/a      | USA, Alaska, Toolik          | BOLD IDS     |
| <i>P. b. brevicornis</i> | BETN4261-19 | n/a      | USA, Alaska, Toolik          | BOLD IDS     |
| <i>P. b. brevicornis</i> | BETN4256-19 | n/a      | USA, Alaska, Toolik          | BOLD IDS     |
| <i>P. b. brevicornis</i> | MT792007    | MZ366473 | Russia, Chukotka, Pevek      | Zubrii, 2022 |
| <i>P. b. brevicornis</i> | MT792008    | n/a      | Russia, Chukotka, Pevek      | Zubrii, 2022 |
| <i>P. b. brevicornis</i> | MT792009    | MZ366474 | Russia, Chukotka, Pevek      | Zubrii, 2022 |
| <i>P. b. brevicornis</i> | MT792010    | MT791964 | Russia, Chukotka, Apapelnino | Zubrii, 2022 |
| <i>P. b. brevicornis</i> | MT792011    | n/a      | Russia, Chukotka, Apapelnino | Zubrii, 2022 |
| <i>P. b. brevicornis</i> | MT792012    | n/a      | Russia, Chukotka, Alkatvaam  | Zubrii, 2022 |
| <i>P. b. brevicornis</i> | MT792013    | n/a      | Russia, Chukotka, Alkatvaam  | Zubrii, 2022 |
| <i>P. b. brevicornis</i> | MT792014    | n/a      | Russia, Chukotka, Alkatvaam  | Zubrii, 2022 |
| <i>P. b. brevicornis</i> | MT792015    | n/a      | Russia, Chukotka, Alkatvaam  | Zubrii, 2022 |
| <i>P. b. brevicornis</i> | MT792016    | n/a      | Russia, Chukotka, Alkatvaam  | Zubrii, 2022 |
| <i>P. b. brevicornis</i> | MT792017    | MT791965 | Russia, Chukotka, Hatyrka    | Zubrii, 2022 |
| <i>P. b. brevicornis</i> | MT792018    | MT791966 | Russia, Chukotka, Hatyrka    | Zubrii, 2022 |
| <i>P. b. brevicornis</i> | MT792019    | n/a      | Russia, Chukotka,            | Zubrii, 2022 |

|                          |          |          |                                              |              |
|--------------------------|----------|----------|----------------------------------------------|--------------|
|                          |          |          | Hatyrka                                      |              |
| <i>P. b. brevicornis</i> | MT792020 | n/a      | Russia, Chukotka, Hatyrka                    | Zubrii, 2022 |
| <i>P. b. brevicornis</i> | MT792021 | MT791967 | Russia, Chukotka, Amguema                    | Zubrii, 2022 |
| <i>P. b. brevicornis</i> | MT792022 | MT791968 | Russia, Chukotka, Amguema                    | Zubrii, 2022 |
| <i>P. b. brevicornis</i> | MT792023 | MT791969 | Russia, Chukotka, Meynipilgino               | Zubrii, 2022 |
| <i>P. b. brevicornis</i> | MZ351277 | n/a      | Russia, Chukotka, Kosa Belyaka               | Zubrii, 2022 |
| <i>P. b. brevicornis</i> | MZ351278 | n/a      | Russia, Chukotka, Kosa Belyaka               | Zubrii, 2022 |
| <i>P. b. brevicornis</i> | MT792024 | MT791970 | Russia, Wrangel Island, Somnitelnaya Bay     | Zubrii, 2022 |
| <i>P. b. brevicornis</i> | MT792025 | MT791971 | Russia, Wrangel Island, Somnitelnie mountain | Zubrii, 2022 |
| <i>P. b. brevicornis</i> | MZ351285 | n/a      | Russia, Wrangel Island, Somnitelnie mountain | Zubrii, 2022 |
| <i>P. b. brevicornis</i> | MZ351282 | n/a      | Russia, Wrangel Island, Somnitelnie mountain | Zubrii, 2022 |
| <i>P. b. brevicornis</i> | MT792026 | MT791972 | Russia, Wrangel Island, Mineeva mountain     | Zubrii, 2022 |
| <i>P. b. brevicornis</i> | MT792027 | n/a      | Russia, Wrangel Island, Mineeva mountain     | Zubrii, 2022 |
| <i>P. b. brevicornis</i> | MT792028 | MT791973 | Russia, Taimyr Peninsula, Kotuy              | Zubrii, 2022 |
| <i>P. b. brevicornis</i> | MT792029 | MT791974 | Russia, Taimyr Peninsula, Kotuy              | Zubrii, 2022 |
| <i>P. b. brevicornis</i> | MT792030 | n/a      | Russia, Taimyr Peninsula, Ary-Mas            | Zubrii, 2022 |
| <i>P. b. brevicornis</i> | MT792031 | MT791975 | Russia, Taimyr Peninsula, Ary-Mas            | Zubrii, 2022 |
| <i>P. b. brevicornis</i> | MT792032 | n/a      | Russia, Taimyr Peninsula, Ary-Mas            | Zubrii, 2022 |
| <i>P. b. brevicornis</i> | MT792033 | n/a      | Russia, Taimyr Peninsula, Ary-Mas            | Zubrii, 2022 |
| <i>P. b. brevicornis</i> | MT792034 | n/a      | Russia, Taimyr Peninsula, Ary-Mas            | Zubrii, 2022 |
| <i>P. b. brevicornis</i> | MT792035 | n/a      | Russia, Taimyr Peninsula, Kotuy              | Zubrii, 2022 |
| <i>P. b. brevicornis</i> | MT792036 | n/a      | Russia, Taimyr Peninsula, Kotuy              | Zubrii, 2022 |
| <i>P. b. brevicornis</i> | MT792037 | n/a      | Russia, Taimyr Peninsula, Kotuy              | Zubrii, 2022 |
| <i>P. b. brevicornis</i> | MT792038 | MT791976 | Russia, Polar Ural, Harp                     | Zubrii, 2022 |
| <i>P. b. brevicornis</i> | MT792039 | MT791977 | Russia, Polar Ural, Harp                     | Zubrii, 2022 |
| <i>P. b. brevicornis</i> | MT792040 | MT791978 | Russia, Polar Ural, Harp                     | Zubrii, 2022 |
| <i>P. b. brevicornis</i> | MT792041 | MZ366462 | Russia, Polar Ural, Harp                     | Zubrii, 2022 |
| <i>P. b. brevicornis</i> | MT792042 | n/a      | Russia, Polar Ural, Harp                     | Zubrii, 2022 |
| <i>P. b. brevicornis</i> | MT792043 | n/a      | Russia, Tazovsky                             | Zubrii, 2022 |

|                          |          |          |                                       |              |
|--------------------------|----------|----------|---------------------------------------|--------------|
|                          |          |          | Peninsula, Messoyaha                  |              |
| <i>P. b. brevicornis</i> | MT792044 | MT791979 | Russia, Tazovsky Peninsula, Messoyaha | Zubrii, 2022 |
| <i>P. b. brevicornis</i> | MT792045 | MT791980 | Russia, Tazovsky Peninsula, Messoyaha | Zubrii, 2022 |
| <i>P. b. brevicornis</i> | MT792046 | n/a      | Russia, Tazovsky Peninsula, Messoyaha | Zubrii, 2022 |
| <i>P. b. brevicornis</i> | MT792047 | MT791981 | Russia, Vaigach Island, Bolvansky Nos | Zubrii, 2022 |
| <i>P. b. brevicornis</i> | MT792048 | MT791982 | Russia, Vaigach Island, Bolvansky Nos | Zubrii, 2022 |
| <i>P. b. brevicornis</i> | MZ351267 | n/a      | Russia, Vaigach Island, Bolvansky Nos | Zubrii, 2022 |
| <i>P. b. brevicornis</i> | MZ351259 | n/a      | Russia, Vaigach Island, Bolvansky Nos | Zubrii, 2022 |
| <i>P. b. brevicornis</i> | MZ351260 | MZ366463 | Russia, Vaigach Island, Bolvansky Nos | Zubrii, 2022 |
| <i>P. b. brevicornis</i> | MZ351261 | MZ366464 | Russia, Vaigach Island, Bolvansky Nos | Zubrii, 2022 |
| <i>P. b. brevicornis</i> | MZ351262 | n/a      | Russia, Vaigach Island, Bolvansky Nos | Zubrii, 2022 |
| <i>P. b. brevicornis</i> | MZ351263 | n/a      | Russia, Vaigach Island, Bolvansky Nos | Zubrii, 2022 |
| <i>P. b. brevicornis</i> | MZ351264 | n/a      | Russia, Vaigach Island, Bolvansky Nos | Zubrii, 2022 |
| <i>P. b. brevicornis</i> | MZ351265 | n/a      | Russia, Vaigach Island, Bolvansky Nos | Zubrii, 2022 |
| <i>P. b. brevicornis</i> | MZ351266 | n/a      | Russia, Vaigach Island, Bolvansky Nos | Zubrii, 2022 |
| <i>P. b. brevicornis</i> | MZ351267 | n/a      | Russia, Vaigach Island, Bolvansky Nos | Zubrii, 2022 |
| <i>P. b. brevicornis</i> | MT792049 | MZ366465 | Russia, Ygorsky Peninsula, Amderma    | Zubrii, 2022 |
| <i>P. b. brevicornis</i> | MT792050 | MZ366466 | Russia, Ygorsky Peninsula, Amderma    | Zubrii, 2022 |
| <i>P. b. brevicornis</i> | MT792051 | n/a      | Russia, Ygorsky Peninsula, Amderma    | Zubrii, 2022 |
| <i>P. b. brevicornis</i> | MT792052 | MT791983 | Russia, Ygorsky Peninsula, Amderma    | Zubrii, 2022 |
| <i>P. b. brevicornis</i> | MZ351269 | MZ366467 | Russia, Ygorsky Peninsula, Amderma    | Zubrii, 2022 |
| <i>P. b. brevicornis</i> | MZ351270 | MZ366468 | Russia, Ygorsky Peninsula             | Zubrii, 2022 |
| <i>P. b. brevicornis</i> | MT792053 | n/a      | Russia, Pinega reserve                | Zubrii, 2022 |
| <i>P. b. brevicornis</i> | MT792054 | MT791984 | Russia, Pinega reserve                | Zubrii, 2022 |
| <i>P. b. brevicornis</i> | MT792055 | MT791985 | Russia, Pinega reserve                | Zubrii, 2022 |
| <i>P. b. brevicornis</i> | MT792056 | MT791986 | Russia, Kanin Peninsula, Shoina       | Zubrii, 2022 |
| <i>P. b. brevicornis</i> | MT792057 | MT791987 | Russia, Kanin Peninsula, Shoina       | Zubrii, 2022 |
| <i>P. b. brevicornis</i> | MT792058 | n/a      | Russia, Kanin Peninsula, Shoina       | Zubrii, 2022 |
| <i>P. b. brevicornis</i> | MT792059 | n/a      | Russia, Kanin Peninsula, Shoina       | Zubrii, 2022 |
| <i>P. b. brevicornis</i> | MT792060 | n/a      | Russia, Kanin Peninsula, Shoina       | Zubrii, 2022 |
| <i>P. b. brevicornis</i> | MT792061 | n/a      | Russia, Kanin Peninsula, Shoina       | Zubrii, 2022 |
| <i>P. b. brevicornis</i> | MT792062 | n/a      | Russia, Kanin Peninsula, Shoina       | Zubrii, 2022 |
| <i>P. b. brevicornis</i> | MT792063 | n/a      | Russia, Kanin                         | Zubrii, 2022 |

|                                                   |             |          |                                  |               |
|---------------------------------------------------|-------------|----------|----------------------------------|---------------|
|                                                   |             |          | Peninsula, Shoina                |               |
| <i>P. b. brevicornis</i>                          | MT792064    | n/a      | Russia, Kanin Peninsula, Shoina  | Zubrii, 2022  |
| <i>P. b. brevicornis</i>                          | MT792065    | n/a      | Russia, Yamal Peninsula, Seyakha | Zubrii, 2022  |
| <i>P. b. brevicornis</i>                          | MT792066    | n/a      | Kamchatka, Karaginskiy Island    | Zubrii, 2022  |
| <i>P. b. brevicornis</i>                          | MZ351281    | n/a      | Kamchatka, Karaginskiy Island    | Zubrii, 2022  |
| <i>Pterostichus nivalis</i><br>R.F.Sahlberg, 1844 | MT792067    | MT791988 | Russia, Chukotka, Apapeligino    | Zubrii, 2022  |
| <i>P. nivalis</i>                                 | MT792068    | MT791989 | Russia, Chukotka, Hatyrka        | Zubrii, 2022  |
| <i>P. nivalis</i>                                 | MT792069    | MT791990 | Russia, Chukotka, Kosa Belyaka   | Zubrii, 2022  |
| <i>P. nivalis</i>                                 | ON366362    | n/a      | Russia, Chukotka, Apapeligino    | Present study |
| <i>P. nivalis</i>                                 | ON366363    | n/a      | Russia, Chukotka, Hatyrka        | Present study |
| <i>P. nivalis</i>                                 | ON366364    | ON366372 | Russia, Chukotka, Kosa Belyaka   | Present study |
| <i>P. nivalis</i>                                 | ON366365    | n/a      | Russia, Chukotka, Kosa Belyaka   | Present study |
| <i>P. nivalis</i>                                 | ON366366    | n/a      | Russia, Chukotka, Kosa Belyaka   | Present study |
| <i>P. nivalis</i>                                 | ON366367    | n/a      | Russia, Chukotka, Kosa Belyaka   | Present study |
| <i>P. nivalis</i>                                 | BETN4139-19 | n/a      | USA, Alaska, Utqiagvik           | BOLD IDS      |
| <i>P. nivalis</i>                                 | BETN4180-19 | n/a      | USA, Alaska, Utqiagvik           | BOLD IDS      |
| <i>P. nivalis</i>                                 | BETN4192-19 | n/a      | USA, Alaska, Utqiagvik           | BOLD IDS      |
| <i>P. nivalis</i>                                 | BETN4194-19 | n/a      | USA, Alaska, Utqiagvik           | BOLD IDS      |
| <i>P. nivalis</i>                                 | BETN4195-19 | n/a      | USA, Alaska, Utqiagvik           | BOLD IDS      |
| <i>P. nivalis</i>                                 | BETN4206-19 | n/a      | USA, Alaska, Utqiagvik           | BOLD IDS      |
| <i>P. nivalis</i>                                 | BETN4216-19 | n/a      | USA, Alaska, Utqiagvik           | BOLD IDS      |
| <i>P. nivalis</i>                                 | BETN4218-19 | n/a      | USA, Alaska, Utqiagvik           | BOLD IDS      |
| <i>P. nivalis</i>                                 | BETN4224-19 | n/a      | USA, Alaska, Utqiagvik           | BOLD IDS      |
| <i>P. nivalis</i>                                 | BETN4408-19 | n/a      | USA, Alaska, Denali Borough      | BOLD IDS      |
| <i>P. nivalis</i>                                 | BETN4430-19 | n/a      | USA, Alaska, Denali Borough      | BOLD IDS      |
| <i>P. nivalis</i>                                 | BETN4432-19 | n/a      | USA, Alaska, Denali Borough      | BOLD IDS      |
| <i>P. nivalis</i>                                 | BETN4435-19 | n/a      | USA, Alaska, Denali Borough      | BOLD IDS      |
| <i>P. nivalis</i>                                 | BETN4450-19 | n/a      | USA, Alaska, Denali Borough      | BOLD IDS      |
| <i>P. nivalis</i>                                 | BETN4453-19 | n/a      | USA, Alaska, Denali Borough      | BOLD IDS      |
| <i>P. nivalis</i>                                 | BETN4491-19 | n/a      | USA, Alaska, Fairbanks Borough   | BOLD IDS      |

|                   |              |     |                                |          |
|-------------------|--------------|-----|--------------------------------|----------|
| <i>P. nivalis</i> | BETN570-18   | n/a | USA, Alaska, Denali Borough    | BOLD IDS |
| <i>P. nivalis</i> | BETN573-18   | n/a | USA, Alaska, Denali Borough    | BOLD IDS |
| <i>P. nivalis</i> | BETN576-18   | n/a | USA, Alaska, Denali Borough    | BOLD IDS |
| <i>P. nivalis</i> | BETN7524-20  | n/a | USA, Alaska, Utqiagvik         | BOLD IDS |
| <i>P. nivalis</i> | BETN7540-20  | n/a | USA, Alaska, Toolik            | BOLD IDS |
| <i>P. nivalis</i> | BETN7557-20  | n/a | USA, Alaska, Toolik            | BOLD IDS |
| <i>P. nivalis</i> | UAMIC1886-14 | n/a | USA, Alaska, St. Matthew Isl.  | BOLD IDS |
| <i>P. nivalis</i> | UAMIC1888-14 | n/a | USA, Alaska, St. Matthew Isl.  | BOLD IDS |
| <i>P. nivalis</i> | BETN4136-19  | n/a | USA, Alaska, Utqiagvik         | BOLD IDS |
| <i>P. nivalis</i> | BETN4137-19  | n/a | USA, Alaska, Utqiagvik         | BOLD IDS |
| <i>P. nivalis</i> | BETN4138-19  | n/a | USA, Alaska, Utqiagvik         | BOLD IDS |
| <i>P. nivalis</i> | BETN4144-19  | n/a | USA, Alaska, Utqiagvik         | BOLD IDS |
| <i>P. nivalis</i> | BETN4146-19  | n/a | USA, Alaska, Utqiagvik         | BOLD IDS |
| <i>P. nivalis</i> | BETN4147-19  | n/a | USA, Alaska, Utqiagvik         | BOLD IDS |
| <i>P. nivalis</i> | BETN4170-19  | n/a | USA, Alaska, Utqiagvik         | BOLD IDS |
| <i>P. nivalis</i> | BETN4171-19  | n/a | USA, Alaska, Utqiagvik         | BOLD IDS |
| <i>P. nivalis</i> | BETN4176-19  | n/a | USA, Alaska, Utqiagvik         | BOLD IDS |
| <i>P. nivalis</i> | BETN4178-19  | n/a | USA, Alaska, Utqiagvik         | BOLD IDS |
| <i>P. nivalis</i> | BETN4193-19  | n/a | USA, Alaska, Utqiagvik         | BOLD IDS |
| <i>P. nivalis</i> | BETN4200-19  | n/a | USA, Alaska, Utqiagvik         | BOLD IDS |
| <i>P. nivalis</i> | BETN4203-19  | n/a | USA, Alaska, Utqiagvik         | BOLD IDS |
| <i>P. nivalis</i> | BETN4205-19  | n/a | USA, Alaska, Utqiagvik         | BOLD IDS |
| <i>P. nivalis</i> | BETN4208-19  | n/a | USA, Alaska, Utqiagvik         | BOLD IDS |
| <i>P. nivalis</i> | BETN4436-19  | n/a | USA, Alaska, Denali Borough    | BOLD IDS |
| <i>P. nivalis</i> | BETN4449-19  | n/a | USA, Alaska, Denali Borough    | BOLD IDS |
| <i>P. nivalis</i> | BETN4460-19  | n/a | USA, Alaska, Denali Borough    | BOLD IDS |
| <i>P. nivalis</i> | BETN4473-19  | n/a | USA, Alaska, Fairbanks Borough | BOLD IDS |
| <i>P. nivalis</i> | BETN4492-19  | n/a | USA, Alaska, Fairbanks Borough | BOLD IDS |
| <i>P. nivalis</i> | BETN575-18   | n/a | USA, Alaska, Denali Borough    | BOLD IDS |
| <i>P. nivalis</i> | BETN7586-20  | n/a | USA, Alaska, Denali Borough    | BOLD IDS |
| <i>P. nivalis</i> | BETN4135-19  | n/a | USA, Alaska, Utqiagvik         | BOLD IDS |
| <i>P. nivalis</i> | BETN4141-19  | n/a | USA, Alaska,                   | BOLD IDS |



|                   |             |     |                             |          |
|-------------------|-------------|-----|-----------------------------|----------|
|                   |             |     | Utqiagvik                   |          |
| <i>P. nivalis</i> | BETN4145-19 | n/a | USA, Alaska, Utqiagvik      | BOLD IDS |
| <i>P. nivalis</i> | BETN4149-19 | n/a | USA, Alaska, Utqiagvik      | BOLD IDS |
| <i>P. nivalis</i> | BETN4207-19 | n/a | USA, Alaska, Utqiagvik      | BOLD IDS |
| <i>P. nivalis</i> | BETN4226-19 | n/a | USA, Alaska, Toolik         | BOLD IDS |
| <i>P. nivalis</i> | BETN4260-19 | n/a | USA, Alaska, Toolik         | BOLD IDS |
| <i>P. nivalis</i> | BETN4407-19 | n/a | USA, Alaska, Denali Borough | BOLD IDS |
| <i>P. nivalis</i> | BETN4448-19 | n/a | USA, Alaska, Denali Borough | BOLD IDS |
| <i>P. nivalis</i> | BETN4451-19 | n/a | USA, Alaska, Denali Borough | BOLD IDS |
| <i>P. nivalis</i> | BETN4452-19 | n/a | USA, Alaska, Denali Borough | BOLD IDS |
| <i>P. nivalis</i> | BETN4454-19 | n/a | USA, Alaska, Denali Borough | BOLD IDS |
| <i>P. nivalis</i> | BETN4471-19 | n/a | USA, Alaska, Denali Borough | BOLD IDS |
| <i>P. nivalis</i> | BETN578-18  | n/a | USA, Alaska, Denali Borough | BOLD IDS |
| <i>P. nivalis</i> | BETN7551-20 | n/a | USA, Alaska, Toolik         | BOLD IDS |
| <i>P. nivalis</i> | BETN7555-20 | n/a | USA, Alaska, Toolik         | BOLD IDS |
| <i>P. nivalis</i> | BETN7558-20 | n/a | USA, Alaska, Toolik         | BOLD IDS |

n/a – not available

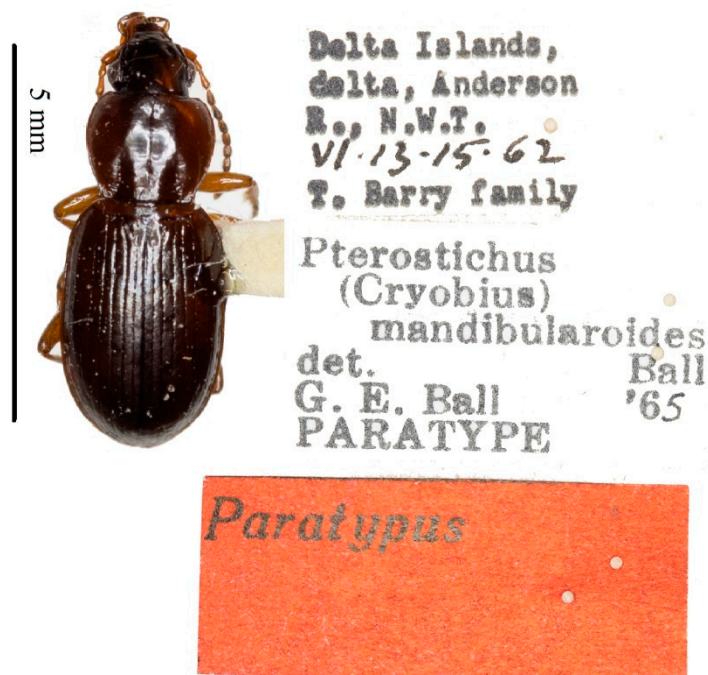

**Figure S1.** Paratypus of *P. mandibularoides* (female specimen) is deposited in the coleoptera collection of the Zoological Institute of the Russian Academy of Sciences (Saint Petersburg, Russia).

**Table S2.** The 28S rRNA gene polymorphism in three species of the *brevicornis* group

| Nucleotide positions within a condensed alignment | <i>Pterostichus mandibularoides</i> | <i>Pterostichus b. brevicornis</i> | <i>Pterostichus nivalis</i> |
|---------------------------------------------------|-------------------------------------|------------------------------------|-----------------------------|
| 68, 172, 177, 289, 432, 448                       | C                                   | T                                  | T                           |

|               |          |          |          |
|---------------|----------|----------|----------|
| 87            | <b>T</b> | <b>C</b> | <b>A</b> |
| 93            | A        | A        | <b>T</b> |
| 96, 400       | T        | T        | <b>A</b> |
| 98            | A        | A        | <b>G</b> |
| 102, 401      | T        | <b>A</b> | T        |
| 123           | <b>G</b> | A/T      | A        |
| 149           | G        | <b>A</b> | G        |
| 168           | <b>T</b> | C        | C        |
| 231           | A        | A/T      | <b>G</b> |
| 232           | A        | <b>C</b> | T        |
| 233           | <b>T</b> | A        | A        |
| 259, 399      | C        | <b>T</b> | C        |
| 267, 272      | C        | A/C      | A        |
| 288, 351, 363 | <b>A</b> | G        | G        |
| 397           | T        | T        | <b>G</b> |
| 425, 429      | C        | T/C      | T        |
| 428           | G        | G        | <b>A</b> |

Letters are FASTA codes for nucleotides but with additional polymorphisms shown explicitly.
